# Supplementary material for: Clinical Application of Whole Exome Sequencing for Monogenic Disorders in PICU of China
Source: Front Genet. 2021 Sep 1;12:677699. doi: 10.3389/fgene.2021.677699 (PMC8440967; doi:10.3389/fgene.2021.677699)
Supplement: Supplementary file 1 [file Table_1.xlsx]

## Sheet: Sheet1
Supplementary table 1: Clinical and Genetic Information of 43 Patients with Positive Molecular Diagnosis in this study
Case	Age	Sex	Gene	Variant	Ref seq	Pathogenicity	Evidence of pathogenicity (ACMG variant guidelines)	Accession number in ClinVar database	DANN	Polyphen2_HDIV	Polyphen2_HVAR	SIFT	frequency in GnomAD	Trio or proband-only	Inherit-ance Pattern	Zygosity	Primary manifestation	Phenotype	Biochemical test/Image examination	Disease	Status	Clinical impact
004	2m	M	ABCC9	c.3203T>C (p.Leu1068Pro)	NM_005691.2	Likely pathogenic	PS2+PM1+PM2+PP3	NA	0.999	1.0	0.996	0.0	0	Trio	AD	De novo het	Multiple congenital anomalies	HP: 0005129 Congenital hypertrophy of left ventricle HP: 0001643 Patent ductus arteriosus HP: 0000998 Hypertrichosis HP: 0000280 Coarse facial features	UCG	Cantu syndrome(OMIM[#]239850)	Alive	Cardiac surveillance
006	8y1m	F	GPI	c.637T>A (p.Phe213Ile)	NM_000175.3	Uncertain significance	PM2+PP2+PP3	NA	0.991	1.0	1.0	0.0	0	Trio	AR	Compound het	Haematilogical	HP: 0000952 Jaundice HP: 0011981 Pigment gallstones HP: 0001744 Splenomegaly HP: 0001930 Nonspherocytic hemolytic anemia HP: 0001250 Seizure HP: 0007185 Loss of consciousness	Glucose phosphate isomerase activity test, autoantibody panel, hemolytic anemia panel, humoral immunity panel, lymphocyte subset panel, complement C3 and C4, coagulation panel, erythrocyte surface associated antibodies	Hemolytic anemia, nonspherocytic, due to glucose phosphate isomerase deficiency(OMIM[#]613470)	Alive	Splenectomy; Follow-up of hematology major regularly
				c.1614C>G (p.His538Gln)	NM_000175.3	Uncertain significance	PM1+PM2+PP2	NA	0.998	1.0	0.993	0.008	0
012	3y	F	ANKS6	c.2420dupT (p.Thr808Aspfs*2)	NM_173551.5	Likely pathogenic	PVS1+PM2	NA					0	Trio	AR	Compound het	Nephritic	HP: 0000083 Renal insufficiency HP: 0001903 Anemia	Humoral immunity panel, lymphocyte subset panel, complement C3 and C4, autoantibody panel, coagulation panel, erythrocyte surface associated antibodies, hemolytic anemia panel, platelet surface associated antibodies, renal function panel	Nephronophthisis 16(OMIM[#]615382	Deceased	Redirection of care
12				c.1973-1G>A	NM_173551.5	Likely pathogenic	PVS1+PM2	NA					0
017	4y6m	F	MCCC1	c.639+2T>A	NM_020166.3	Pathogenic	PVS1+PM2+PP5	VCV000476398					8.1e-06	Trio	AR	Compound het	Neurological	HP: 0001254 Lethargy HP: 0001259 Coma HP: 0001250 Seizures HP: 0001252 Muscular hypotonia HP: 0008281 Acute hyperammonemia HP: 0001263 Global developmental delay	Lactic acid, CSF lactic acid, ammonia, AA, AC, UOA, carnitine, biotinidase	3-methylcrotonyl-coa carboxylase 1 deficiency(OMIM[#]210200)	Alive	Rehabilitation Protein-restricted diet; Biotin supplementation; Ammonia surveillance
17				c.1679dupA (p.Asn560Lysfs*10)	NM_020166.3	Pathogenic	PVS1+PM2+PP5	VCV000542948					0
026	5m	F	RAG1	c.1528G>T (p.Glu510*)	NM_000448.2	Pathogenic	PVS1+PM2+PP3+PP4	NA	0.996				0	Trio	AR	Compound het	Gastrointestinal	HP: 0002090 Pneumonia HP: 0002014 Diarrhea HP: 0004430 Severe combined immunodeficiency HP: 0003139 Panhypogammaglobulinemia HP: 0005379 Severe T lymphocytopenia HP: 0010976 B lymphocytopenia	Humoral immunity panel, CH50, lymphocyte subset panel	Severe combined immunodeficiency, autosomal recessive, T cell-negative, B cell-negative, NK cell-positive(OMIM[#]601457)	Decreased	NA
26				c.2393A>G (p.His798Arg)	NM_000448.2	Likely pathogenic	PM3+PM2+PP3+PP4	NA	0.998	0.99	0.985	0.0	0
027	3y6m	M	MAP2K1	c.389A>G (p.Tyr130Cys)	NM_002755.3	Pathogenic	PS2+PS3+PM1+PM2+PP2+PP3+PP5	VCV000013351	0.998	1.0	0.999	0.0	4.061e-06	Proband-only	AD	Het	Multiple congenital anomalies	HP: 0001508 Failure to thrive HP: 0001263 Global developmental delay HP: 0001250 Seizure HP: 0001639 Hypertrophic cardiomyopathy	UCG, ammonia, AA, AC, UOA, carnitine, biotinidase	Cardiofaciocutaneous syndrome 3(OMIM[#]615279)	Alive	NA
032	3m	M	IGHMBP2	c.1061-2A>G	NM_002180.2	Likely pathogenic	PVS1+PM2	NA				0.0	0	Trio	AR	Homo	Musculature	HP: 0001612 Weak cry HP: 0001622 Premature birth HP: 0001511 Intrauterine growth retardation HP: 0001518 Small for gestational age HP: 0003690 Limb muscle weakness HP: 0001508 Failure to thrive HP: 0002789 Tachypnea HP: 0002878 Respiratory failure HP: 0001265 Hyporeflexia HP: 0001263 Global developmental delay HP: 0100490 Camptodactyly of finger	UCG, MR (brain), ammonia, AA, AC, UOA, carnitine, biotinidase	Spinal muscular atrophy, distal, autosomal recessive, 1(OMIM[#]604320)	Decreased	Redirection of care
034	13y10m	M	ALMS1	c.8532_8533insA (p.Leu2845Thrfs*3)	NM_015120.4	Likely pathogenic	PVS1+PM2	NA					0	Proband-only	AR	Compound het	Endocrine/metabolic	HP: 0001397 Hepatic steatosis HP: 0000505 Visual impairment HP: 0003119 Abnormality of lipid metabolism HP: 0000639 Nystagmus HP: 0001263 Global developmental delay HP: 0002240 Hepatomegaly HP: 0001744 Splenomegaly HP: 0002155 Hypertriglyceridemia HP: 0000083 Renal insufficiency HP: 0005978 Type II diabetes mellitus HP: 0000822 Hypertension HP: 0002092 Pulmonary hypertension HP: 0000873 Diabetes …	UCG, hyperglycemia panel, lipid metabolism panel, renal function panel	Alstrom syndrome(OMIM[#]203800)	Deceased	Redirection of care
34				c.9152_9153delCT (p.Cys3053Serfs*9)	NM_015120.4	Likely pathogenic	PVS1+PM2	NA					0
041	3y10m	M	GAA	c.1082C>T (p.Pro361Leu)	NM_000152.3	Likely pathogenic	PM1+PM2+PP3+PP5	VCV000403712	0.999	1.0	0.997	0.001	1.224e-05	Trio	AR	Compound het	Cardiac	HP: 0001639 Hypertrophic cardiomyopathy HP: 0001252 Muscular hypotonia HP: 0002094 Dyspnea HP: 0002747 Respiratory insufficiency due to muscle weakness HP: 0003198 Myopathy HP: 0011675 Arrhythmia	UCG	Glycogen storage disease Ⅱ(OMIM[#]232300)	Deceased	Redirection of care; Sister diagnosed and started on enzyme replacement therapy
41				c.2051C>T (p.Pro684Leu)	NM_000152.3	Uncertain significance	PM1+PM2+PP3	VCV000285821	0.999	1.0	1.0	0.0	7.277e-05
043	1y8m	M	BTK	c.1781G>A (p.Gly594Glu)	NM_000061.2	Pathogenic	PS2+PS3+PM1+PM2+PP3	NA	0.998	1.0	1.0	0.0	0	Trio	XLD	De novo hemi	Pulmonary	HP: 0004432 Agammaglobulinemia HP: 0002090 Pneumonia	CH50, lymphocyte subset panel, humoral immunity panel	Agammaglobulinemia, X-linked(OMIM[#]300755)	Alive	Immunoglobulin replacement therapy
050	1m	F	KMT2D	c.14113_14123del11 (p.Ile4705Phefs*4)	NM_003482.3	Pathogenic	PVS1+PS2+PM2	NA					0	Trio	AD	De novo het	Multiple congenital anomalies	HP: 0001680 Coarctation of aorta HP: 0001007 Hirsutism HP: 0000347Micrognathia	UCG, hypoglycemia panel	Kabuki syndrome 1(OMIM[#]147920)	Alive	Routine monitoring of aortic valve stenosis; Endocrinology and audiology evaluation
057	1y3m	F	IL10RA	c.301C>T (p.Arg101Trp)	NM_001558.3	Pathogenic	PS3+PM1+PM2+PP3+PP5	VCV000039432	0.999	1.0	1.0	0.0	2.031e-05	Trio	AR	Compound het	Gastrointestinal	HP: 0002014 Diarrhea HP: 0004387 Enterocolitis HP: 0009789 Perianal abscess HP: 0000999 Pyoderma	Ultrasound (gastrointestinal tract), humoral immunity panel, lymphocyte subset panel	Inflammatory bowel disease 28, autosomal recessive(OMIM[#]613148)	Deceased	NA
57				c.537G>A (p.Thr179Thr)	NM_001558.3	Likely pathogenic	PM2+PM3+PP3+PP5	VCV000830051					8.124e-06
059	12y2m	M	ASL	c.91G>A(p.Asp31Asn)	NM_000048.3	Likely pathogenic	PM1+PM2+PP3+PP5	VCV000551039	0.999	1.0	0.996	0.001	8.135e-06	Trio	AR	Compound het	Neurological	HP: 0001254 Lethargy HP: 0001987 Hyperammonemia HP: 0002013 Vomiting HP: 0002240 Hepatomegaly HP: 0001263 Global developmental delay	Ammonia, AA, AC, UOA, carnitine, biotinidase, homocysteine	Argininosuccinic aciduria(OMIM[#]207900)	Alive	Protein-restricted diet; Arginine; Ammonia surveillance
59				c.965_966insCAAAGACTT(p.Asn322_Lys323insLysAspPhe)	NM_000048.3	Likely pathogenic	PM2+PM3+PM4	NA					0
065	2m	M	GABRB2	c.909G>T(p.Lys303Asn)	NM_021911.3	Pathogenic	PS2+PM1+PM2+PP3+PP5	VCV000265166	0.998	1.0	1.0	0.0	0	Trio	AD	De novo het	Neurological	HP: 0011968 Feeding difficulties HP: 0001332 Dystonia HP: 0002353 EEG abnormality HP: 0001250 Seizures HP: 0000666 Horizontal nystagmus	Ammonia, AA, AC, UOA, carnitine, biotinidase, homocysteine, lactic acid	Epileptic encephalopathy, infantile or early children,2(OMIM[#]617829)	Alive	NA
075	8y4d	F	ATP7B	c.2333G>T (p.Arg778Leu)	NM_000053.2	Pathogenic	PS3+PM1+PM2+PP3+PP5	VCV000003852	0.999	1.0	1.0	0.002	0.0001	Trio	AR	Homo	Hepatic	HP: 000952 Jaundice HP: 0001878 Hemolytic anemia HP: 0001399 Hepatic failure HP: 0200032 Kayser-Fleischer ring HP: 0010837 Decreased serum ceruloplasmin HP: 0010839 Increased urinary copper concentration	Serum ceruloplasmin, urinary copper excretion, hemolytic anemia panel, hepatic function panel	Wilson disease(OMIM[#]277900)	Alive	Penicillamine and Zinc Sulfate; Liver function and hemolysis surveillance
081	11m7d	M	CASZ1	c.2443_2459del GTGGGCACCCCCAGCCT(p.Val815Profs*14)	NM_001079843.3	Pathogenic	PVS1+PS2+PM2	NA					0	Trio	AD	De novo het	Cardiac	HP: 0001644 Dilated cardiomyopathy HP: 0011664 Left ventricular noncompaction cardiomyopathy HP: 0001695 Cardiac arrest	UCG	aCASTOR ZINC FINGER PROTEIN 1; CASZ1（OMIM[*]609895）	Deceased	NA
084	1y1m	F	IFIH1	c.1852C>T(p.Arg618*)	NM_022168.2	Likely pathogenic	PS2+PM2+PP3	NA	0.998				1.627e-05	Trio	AD	De novo het	Neurological	HP: 0001250 Seizures HP: 0001263 Global developmental delay HP: 0000252 Microcephaly HP: 0001252 Muscular hypotonia HP: 0002240 Hepatomegaly	MR(brain+spinal cord), lactic acid, ammonia	Aicardi-Goutieres syndrome 7(OMIM[#]615846)	Deceased	Redirection of care
091	10m	F	HMGCS2	c.1347_1351del AGCCT (p.Ala450Profs*7)	NM_005518.3	Likely pathogenic	PVS1+PM2	NA					0	Trio	AR	Compound het	Endocrine/metabolic	HP: 0002013 Vomiting HP: 0002910 Elevated hepatic transaminases HP: 0001942 Metabolic acidosis	Ammonia, AA, AC, UOA, carnitine, biotinidase, lactic acid, homocysteine, hypoglycemia panel	3-hydroxy-3-methylglutaryl-CoA synthase-2 deficiency(OMIM[#]605911)	Alive	Avoid prolonged hunger; Coenzyme Q10 and levocarnitine; Liver function and blood gas analysis surveillance
91				c.1201G>T (p.Glu401*)	NM_005518.3	Likely pathogenic	PVS1+PM2	NA	0.994				0
096	2m	F	MMACHC	c.566_567insT (p.Ile190Tyrfs*13)	NM_015506.2	Pathogenic	PVS1+PM2+PP5	VCV000556708					1.2e-05	Trio	AR	Compound het	Haematilogical	HP: 0001875 Neutropenia HP: 0001873 Thrombocytopenia HP: 0001254 Lethargy HP: 0002160 Hyperhomocystinemia HP: 0002912 Methylmalonic acidemia	Homocysteine, lactic acid, ammonia, AA, AC, UOA, carnitine, biotinidase, platelet surface associated antibodies	Methylmalonic aciduria and homocystinuria, cblC type(OMIM[#]277400)	Alive	Redirection of care; Vitamin B6, Vitamin B12, Levocarnitine，folic acid and betaine
96				c.609G>A (p.Trp203*)	NM_015506.2	Pathogenic	PVS1+PM2+PP3+PP5	VCV000030800	0.990				4.061e-05
103	5m	F	RNU4ATAC	n.16G>A (non-coding transcript variant-regulatory mutation)	NR_023343.1	Likely pathogenic	PS3+PM2+PP5	VCV000218082					0.00014	Trio	AR	Compound het	Multiple congenital anomalies	HP: 0000252 Microcephaly HP: 0001622 Premature birth HP: 0001518 Small for gestational age HP: 0001511 Intrauterine growth retardation HP: 0002719 Recurrent infections HP: 0007598 Bilateral single transverse palmar creases HP: 0001263 Global developmental delay	Lymphocyte subset panel, humoral immunity panel	Roifman syndrome(OMIM[#]616651)	Deceased	NA
103				n.51G>A (non-coding transcript variant-regulatory mutation)	NR_023343.1	Likely pathogenic	PS3+PM2+PP5	VCV000030178					0.00045
105	5y11m	M	ELN	c.1621C>T (p.Arg541*)	NM_000501.3	Pathogenic	PVS1+PM2+PP5	VCV000016723	0.998				0	Proband-only	AD	Het	Cardiac	HP: 0004415 Pulmonary artery stenosis HP: 0004928 Peripheral arterial stenosis HP: 0004381 Supravalvular aortic stenosis	UCG	Supravalvular aortic stenosis(OMIM[#]185500)	Deceased	Redirection of care
106	2m	M	KRAS	c.173C>T (p.Thr58Ile)	NM_004985.3	Pathogenic	PS3+PM1+PM2+PP3+PP5	VCV000012588	0.999	1.0	1.0	0.0	0	Proband-only	AD	Het	Multiple congenital anomalies	HP: 0000465 Webbed neck HP: 0000369 Low-set ears HP: 0000316 Hypertelorism HP: 0001642 Pulmonic stenosis	UCG	Noonan syndrome 3(OMIM[#]609942)	Alive	Routine monitoring of pulmonic; Regular follow-up of cardiac and neurology
109	2m	M	EIF2AK3	c.641A>G (p.Tyr214Cys)	NM_004836.5	Likely pathogenic	PM1+PM2+PM3	NA	0.998	1.0	0.997	0.0	4.067e-06	Trio	AR	Compound het	Endocrine/metabolic	HP: 0100651 Type I diabetes mellitus HP: 0001953 Diabetic ketoacidosis	Ammonia, AA, AC, UOA, carnitine, biotinidase, homocysteine, lactic acid, hyperglycemia panel	Epiphyseal dysplasia, multiple, with early-onset diabetes mellitus(OMIM[#]226980)	Alive	Height, weight and growth evaluation
109				c.12delC (p.Ile5Serfs*66)	NM_004836.5	Likely pathogenic	PVS1+PM2	NA					0
112	2y2m	F	MPZ	c.380G>A (p.Cys127Tyr)	NM_000530.6	Likely pathogenic	PM1+PM2+PM5+PP3	VCV000637350	0.997	0.997	0.898	0.0	0	Trio	AD	De novo het	Musculature	HP: 0001252 Muscular hypotonia HP: 0001265 Hyporeflexia HP: 0001270 Motor delay HP: 0002460 Distal muscle weakness HP: 0003593 Infantile onset	NA	Hypertrophic neuropathy of Dejerine-Sottas(OMIM[#]145900)	Alive	NA
113	2y5m	M	RYR1	c.6721C>T (p.Arg2241*)	NM_000540.2	Pathogenic	PVS1+PM2+PP3+PP5	VCV000159856	0.998				0.0001	Trio	AR	Compound het	Musculature	HP: 0001270 Motor delay HP: 0001319 Neonatal hypotonia HP: 0001252 Muscular hypotonia HP: 0003324 Generalized muscle weakness HP: 0003593 Infantile onset	NA	Central core disease of muscle(OMIM[#]117000)	Deceased	Redirection of care
113				c.5915A>T (p.Asn1972Ile)	NM_000540.2	Likely pathogenic	PM2+PM3+PP3	NA	0.990	1.0	0.997	0.0	0
120	6m	F	SCN1A	c.2758C>A (p.Arg920Ser)	NM_006920.4	Likely pathogenic	PM1+PM2+PM5+PP3	NA	0.998	1.0	0.997	0.0	0	Trio	AD	De novo het	Neurological	HP: 0003593 Infantile onset HP: 0002123 Generalized myoclonic seizures HP: 0002133 Status epilepticus HP: 0200134 Epileptic encephalopathy	MR(brain), ammonia, AA, AC, UOA, carnitine, biotinidase, homocysteine, lactic acid, CSF lactic acid	Epileptic encephalopathy, early infantile, 6(OMIM[#]607208)	Alive	NA
140	1m	F	SCN2A	c.4976C>T (p.Ala1659Val)	NM_021007.2	Likely pathogenic	PM1+PM2+PP3+PP5	VCV000410984	0.999	1.0	0.999	0.0	0	Trio	AD	De novo het	Neurological	HP: 0000961 Cyanosis HP: 0007334 Bilateral tonic-clonic seizure with focal onset	MR(brain), ammonia, AA, AC, UOA, carnitine, biotinidase, homocysteine, lactic acid, CSF lactic acid	Seizures, benign familial infantile, 3(OMIM[#]607745)	Deceased	Redirection of care
149	5y3m	M	MID1	c.1863_1879dupGAACTCCATCCACCTCT (p.Tyr627*)	NM_000381.3	Likely pathogenic	PVS1+PM2	NA					0	Trio	XLR	Inherited hemi (maternal carrier)	Multiple congenital anomalies	HP: 0000028 Cryptorchidism HP: 0000047 Hypospadias HP: 0000316 Hypertelorism HP: 0002023 Anal atresia HP: 0000767 Pectus excavatum	NA	Opitz GBBB syndrome, type I(OMIM[#]300000)	Alive	NA
151	1m	M	KCNJ11	c.601C>T (p.Arg201Cys)	NM_000525.3	Pathogenic	PS3+PM1+PM2+PP3+PP5	VCV000008668	0.999	1.0	1.0	0.0	0	Trio	AD	De novo het	Endocrine/metabolic	HP: 0040217 Elevated hemoglobin A1c HP: 0003074 Hyperglycemia HP: 0001953 Diabetic ketoacidosis	Hyperglycemia panel	Diabetes mellitus, transient neonatal, 3(OMIM[#]610582)	Alive	NA
153	1m	M	KMT2D	c.5269C>T (p.Arg1757*)	NM_003482.3	Pathogenic	PM2+PP3+PP5	VCV000435669	0.997				0	Trio	AD	De novo het	Multiple congenital anomalies	HP: 0001631 Defect in the atrial septum HP: 0001629 Ventricular septal defect HP: 0001252 Muscular hypotonia HP: 0000400 Macrotia HP: 0001943 Hypoglycemia	UCG, hypoglycemia panel	Kabuki syndrome 1(OMIM[#]147920)	Alive	Cardiac surveillance; Endocrinology and audiology evaluation
154	8m	M	ACADM	c.449_452delTGAC (p.Thr150Argfs*4)	NM_000016.4	Pathogenic	PVS1+PM2+PP5	RCV000169427					2e-05	Trio	AR	Compound het	Neurological	HP: 0001250 Seizures HP: 0001254 Lethargy HP: 0001263 Global developmental delay HP: 0001943 Hypoglycemia HP: 0001942 Metabolic acidosis HP: 0002240 Hepatomegaly HP: 0008309 Medium chain dicarboxylic aciduria HP: 0001252 Muscular hypotonia	Ammonia, AA, AC, UOA, carnitine, biotinidase	Acyl-CoA dehydrogenase, medium-chain, deficiency of(OMIM[#]201450)	Alive	Avoid prolonged hunger; Levocarnitine; Regular follow-up of neurology; Initiated a reproductive program
154				c.1010A>C (p.Tyr337Ser)	NM_000016.4	Likely pathogenic	PM1+PM2+PM3+PP5	VCV001067387	0.959	0.169	0.496	0.541	4.062e-06
159	13y4m	F	TP53	c.375G>A (p.Thr125Thr)	NM_000546.4	Pathogenic	PS3+PM2+PP1+PP2+PP3+PP5	VCV000177825					0	Trio	AD	Inherited het ( Paternal carrier)	Neurological	HP: 0100843 Glioblastoma	MR(brain)	Glioma susceptibility 1(OMIM[#]137800)	Alive	NA
176	9y7d	M	SCN5A	c.4895G>A (p.Arg1632His)	NM_198056.2	Likely pathogenic	PM1+PM2+PP3+PP5	VCV000067939	1.000	1.0	0.998	0.0	4.061e-06	Trio	AD	Inherited het (maternal carrier)	Cardiac	HP: 0001688 Sinus bradycardia HP: 0001678 Atrioventricular block HP: 0011704 Sick sinus syndrome HP: 0005155 Ventricular escape rhythms	UCG, Holter	Sick sinus syndrome 1 (OMIM[#]608567)	Alive	Electrocardiogram and echocardiography surveillance regularly
177	5m	M	IL36RN	c.115+6T>C	NM_012275.2	Pathogenic	PS3+PS4+PM2	VCV000040005					0.001	Trio	AR	Homo	Dermopathic	HP: 0003765 Psoriasis HP: 0200039 Pustule HP: 0010783 Erythema	NA	Psoriasis 14, pustular(OMIM[#]614204)	Alive	Follow-up of dermatological major
178	2y3m	M	P4HB	c.236dupT (p.Leu79Phefs*11)	NM_000918.4	Pathogenic	PVS1+PS2+PM2	NA					0	Trio	AD	De novo het	Pulmonary	HP: 0004322 Short stature	NA	Cole-carpenter syndrome 1(OMIM[#]112240)	Deceased	NA
181	12y5m	M	FBN1	c.1995C>A (p.Tyr665*)	NM_000138.4	Pathogenic	PM2+PP3	NA	0.997				0	Trio	AD	De novo het	Multiple congenital anomalies	HP: 0000767 Pectus excavatum HP: 0000098 Tall stature HP: 0000268 Dolichocephaly HP: 0000275 Narrow face HP: 0000276 Long face HP: 0000545 Myopia HP: 0001002 Decreased subcutaneous fat HP: 0002616 Aortic root dilation	UCG	Marfan syndrome(OMIM[#]154700)	Alive	Routine monitoring of aorta
186	2y8m	M	CPT2	c.1148T>A (p.Phe383Tyr)	NM_000098.2	Likely pathogenic	PS3+PM2+PP3+PP5	VCV000008958	0.918	0.83	0.845	0.612	2.437e-05	Trio	AR	Compound het	Neurological	HP: 0001254 Lethargy HP: 0001250 Seizures HP: 0002910 Elevated hepatic transaminases HP: 0002240 Hepatomegaly HP: 0001987 Hyperammonemia HP: 0003198 Myopathy	MR(brain), ammonia, AA, AC, UOA, carnitine, biotinidase, homocysteine, lactic acid, creatine kinase	Carnitine palmitoyltransferase Ⅱ deficiency, infantile(OMIM[#]600649)	Alive	High-carbohydrate and low-fat diet; Levocarnitine; Regular monitoring of liver function, muscle enzyme, blood glucose, blood lipid and echocardiography
186				c.1749C>A (p.Asn583Lys)	NM_000098.2	Uncertain significance	PM2+PP3	NA	0.997	1.0	0.998	0.002	0
187	1y2m	F	TNNI3	c.536A>G (p.Glu179Gly)	NM_000363.4	Likely pathogenic	PS2+PM2	NA	0.997	0.689	0.117	0.035	0	Trio	AD	De novo het	Cardiac	HP: 0001644 Dilated cardiomyopathy	UCG	Cardiomyopathy, dilated, 1FF(OMIM[#]613286)	Alive	Cardiac surveillance
196	8y8m	F	SDHB	c.137G>A (p.Arg46Gln)	NM_003000.2	Likely pathogenic	PM1+PM2+PP3+PP5	VCV000183793	1.000	1.0	1.0	0.0	4.063e-06	Proband-only	AD	Het	Neurological	HP: 0002666 Pheochromocytoma HP: 0000875 Episodic hypertension HP: 0001920 Renal artery stenosis HP: 0003345 Elevated urinary norepinephrine HP: 0000093 Proteinuria	Ultrasound (urinary system), renin-angiotensin-aldosterone system panel, catecholamine (serum+urine)	Pheochromocytoma(OMIM[#]171300)	Alive	NA
197	14y7m	F	ATP7B	c.3836A>G (p.Asp1279Gly)	NM_000053.2	Likely pathogenic	PM1+PM2+PM3+PP3	VCV000553495	0.993	1.0	0.999	0.01	4.061e-06	Trio	AR	Compound het	Hepatic	HP: 000952 Jaundice HP: 0001878 Hemolytic anemia HP: 0000093 Proteinuria HP: 001399 Hepatic failure HP: 0200032 Kayser-Fleischer ring HP: 0010837 Decreased serum ceruloplasmin HP: 0010839 Increased urinary copper concentration	Serum ceruloplasmin, urinary copper excretion, hemolytic anemia panel, hepatic function panel, ammonia	Wilson disease(OMIM[#]277900)	Alive	Penicillamine and zinc sulfate; Liver function and hemolysis surveillance
197				c.3168delT (p.Leu1057Trpfs*64)	NM_000053.2	Likely pathogenic	PVS1+PM2	NA					0
201	8y8m	F	ATP7B	c.2333G>T (p.Arg778Leu)	NM_000053.2	Pathogenic	PS3+PM1+PM2+PP3+PP5	VCV000003852	0.999	1.0	1.0	0.002	0.0001	Trio	AR	Compound het	Hepatic	HP: 0001399 Hepatic failure HP: 000952 Jaundice HP: 0002611 Cholestatic liver disease HP: 0010837 Decreased serum ceruloplasmin	Serum ceruloplasmin, hemolytic anemia panel, hepatic function panel	Wilson disease(OMIM[#]277900)	Deceased	Redirection of care
201				c.2975C>T (p.Pro992Leu)	NM_000053.2	Pathogenic	PS3+PM1+PM2+PP3+PP5	VCV000188831	0.997	1.0	1.0	0.228	4.064e-06
204	2m26d	M	G6PC	c.248G>A (p.Arg83His)	NM_000151.2	Pathogenic	PS3+PM1+PM2+PP3+PP5	VCV000038300	0.999	1	0.999	0	4.061e-05	Trio	AR	Compound het	Endocrine/metabolic	HP: 0002910 Elevated hepatic transaminases HP: 0003128 Lactic acidosis HP: 0001943 Hypoglycemia HP: 002149 Hyperuricemia HP: 0002240 Hepatomegaly HP: 0001538 Protuberant abdomen HP: 0002155 Hypertriglyceridemia	MR(brain), AA, AC, UOA, carnitine, biotinidase, homocysteine, lactic acid, hepatic function panel	Glycogen storage disease Ia(OMIM[#]232200)	Alive	Avoid prolonged hunger; Monitor blood glucose, height, weight; Endocrine follow-up
204				c.310C>T (p.Gln104*)	NM_000151.2	Pathogenic	PVS1+PM2+PP3+PP5	VCV000948256	0.998				0
205	4m15d	M	CFH	c.3548G>T (p.Trp1183Leu)	NM_000186.3	Likely pathogenic	PS2+PM1+PM2+PP3	NA	0.98	0.996	0.967	0.008	0	Trio	AD	De novo het	Haematilogical	HP: 0005369 Decreased serum complement factor H HP: 0000790 Hematuria	Complement C3 and C4, autoantibody panel, serum complement factor H, AA, AC, UOA, carnitine, biotinidase, renal function panel	Complement factor H deficiency(OMIM[#]609814)	Deceased	Redirection of care
a Gene description see reference “Guo, J., Li, Z., Hao, C., Guo, R., Hu, X., Qian, S. et al. (2019). A novel de novo CASZ1 heterozygous frameshift variant causes dilated cardiomyopathy and left ventricular noncompaction cardiomyopathy. Mol Genet Genomic Med. 7(8):e828. doi: 10.1002/mgg3.828.” NA, not available; AA, plasma amino acids; AC, acylcarnitine; AD, autosomal dominant; AR, autosomal reces…
